# Supplementary material
Source: publisher figshare collection journal article supplement (https://springernature.figshare.com/ndownloader/files/14330804)
Supplement: Supplementary file [file 14330804]

Additional file 2. GRADE evidence profile

| <b>Secondary alveolar bone grafting<br/>in patients with cleft lip and palate</b> |                     |                      |                     |                    |                         |                                      |                              |                   |                                 |                                                 |                                                     |
|-----------------------------------------------------------------------------------|---------------------|----------------------|---------------------|--------------------|-------------------------|--------------------------------------|------------------------------|-------------------|---------------------------------|-------------------------------------------------|-----------------------------------------------------|
| <b>Certainty assessment</b>                                                       |                     |                      |                     |                    |                         |                                      | <b>Summary of findings</b>   |                   |                                 |                                                 |                                                     |
| <b>No of participants (studies)<br/>Follow-up</b>                                 | <b>Risk of bias</b> | <b>Inconsistency</b> | <b>Indirectness</b> | <b>Imprecision</b> | <b>Publication bias</b> | <b>Overall certainty of evidence</b> | <b>Study event rates (%)</b> |                   | <b>Relative effect (95% CI)</b> | <b>Anticipated absolute effects</b>             |                                                     |
|                                                                                   |                     |                      |                     |                    |                         |                                      | <b>With Iliac crest</b>      | <b>With BMP-2</b> |                                 | <b>Risk with Iliac crest</b>                    | <b>Risk difference with BMP-2</b>                   |
| <b>Bone volume (follow up: 6 months)</b>                                          |                     |                      |                     |                    |                         |                                      |                              |                   |                                 |                                                 |                                                     |
| 35<br>(3 RCTs)                                                                    | serious<br>a        | not serious          | not serious         | not serious        | none                    | ⊕⊕⊕○<br>MODERATE                     | 17                           | 18                | -                               | The mean bone volume ranged from <b>48-76</b> % | MD <b>14.41 % fewer</b> (22.39 fewer to 6.42 fewer) |
| <b>Bone volume (follow up: 12 months)</b>                                         |                     |                      |                     |                    |                         |                                      |                              |                   |                                 |                                                 |                                                     |
| 49<br>(3 RCTs)                                                                    | serious<br>a        | not serious          | not serious         | not serious        | none                    | ⊕⊕⊕○<br>MODERATE                     | 26                           | 23                | -                               | The mean bone volume ranged from <b>66-80</b> % | MD <b>6.22 % more</b> (15.96 fewer to 28.42 more)   |
| <b>Bone height (follow up: 6 months)</b>                                          |                     |                      |                     |                    |                         |                                      |                              |                   |                                 |                                                 |                                                     |
| 28<br>(2 RCTs)                                                                    | serious<br>a        | not serious          | not serious         | not serious        | none                    | ⊕⊕⊕○<br>MODERATE                     | 14                           | 14                | -                               | The mean bone height ranged from <b>64-83</b> % | MD <b>18.73 % fewer</b> (43.56 fewer to 6.08 more)  |
| <b>Bone height (follow up: 12 months)</b>                                         |                     |                      |                     |                    |                         |                                      |                              |                   |                                 |                                                 |                                                     |
| 49<br>(3 RCTs)                                                                    | serious<br>a        | not serious          | not serious         | not serious        | none                    | ⊕⊕⊕○<br>MODERATE                     | 26                           | 23                | -                               | The mean bone height ranged from <b>64-86</b> % | MD <b>4.4 % fewer</b> (30.63 fewer to 21.83 more)   |
| <b>Hospital stay</b>                                                              |                     |                      |                     |                    |                         |                                      |                              |                   |                                 |                                                 |                                                     |

**CI:** Confidence interval; **MD:** Mean difference

### **Explanations**

**a.** All the studies are assessed as being at high risk of bias. Random sequence generation: All the studies mentioned random allocation but none mentioned the detail of sequence generation. Thus, the sequence generation was not clear. Allocation concealment: None of the included studies had clearly described the allocation concealment. Blinding of participants and personnel: None of the studies mentioned whether the surgeon or participants were blinded, so blinding was also considered to be unknown. Blinding of outcome assessment: None of the studies mentioned blinding of outcome assessors. Incomplete outcome data: From all the studies, there were no reported drop outs. Selective reporting: In Dickinson 2008 some of the variables mentioned in "materials and methods" were not fully reported in "results". Other bias: We did not find any other source of bias.
